# Supplementary material
Source: PubMed Central journal article supplement (PMC9283964)
Supplement: 10.1182-2022016175_bloodbld2022016175-suppl1.pdf [file 10.1182-2022016175_bloodbld2022016175-suppl1.pdf]

# Supplemental Figure 1

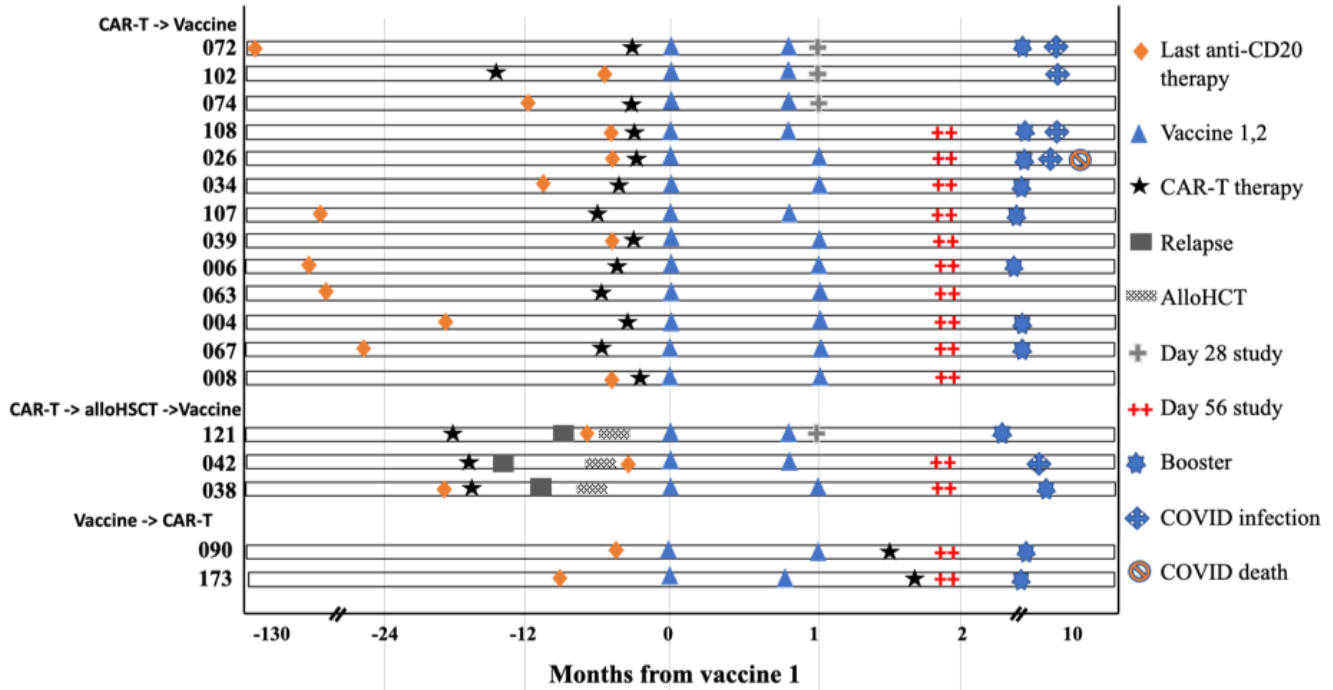

## Supplemental Figure 1: Swimmers plot to describe key events as it relates to COVID vaccine administration and CART Therapy

A total of 5 of 18 patients had developed COVID-19 at the time of data-cut. Two patients developed COVID-19 prior to receiving their third shot of the vaccine (vs three who developed COVID-19 at a timepoint afterwards). Three of these patients were treated with COVID-directed therapies (including monoclonal antibodies). One of the five patients required hospitalization and unfortunately passed away due to COVID-19 complications.

## Supplemental Figure 2

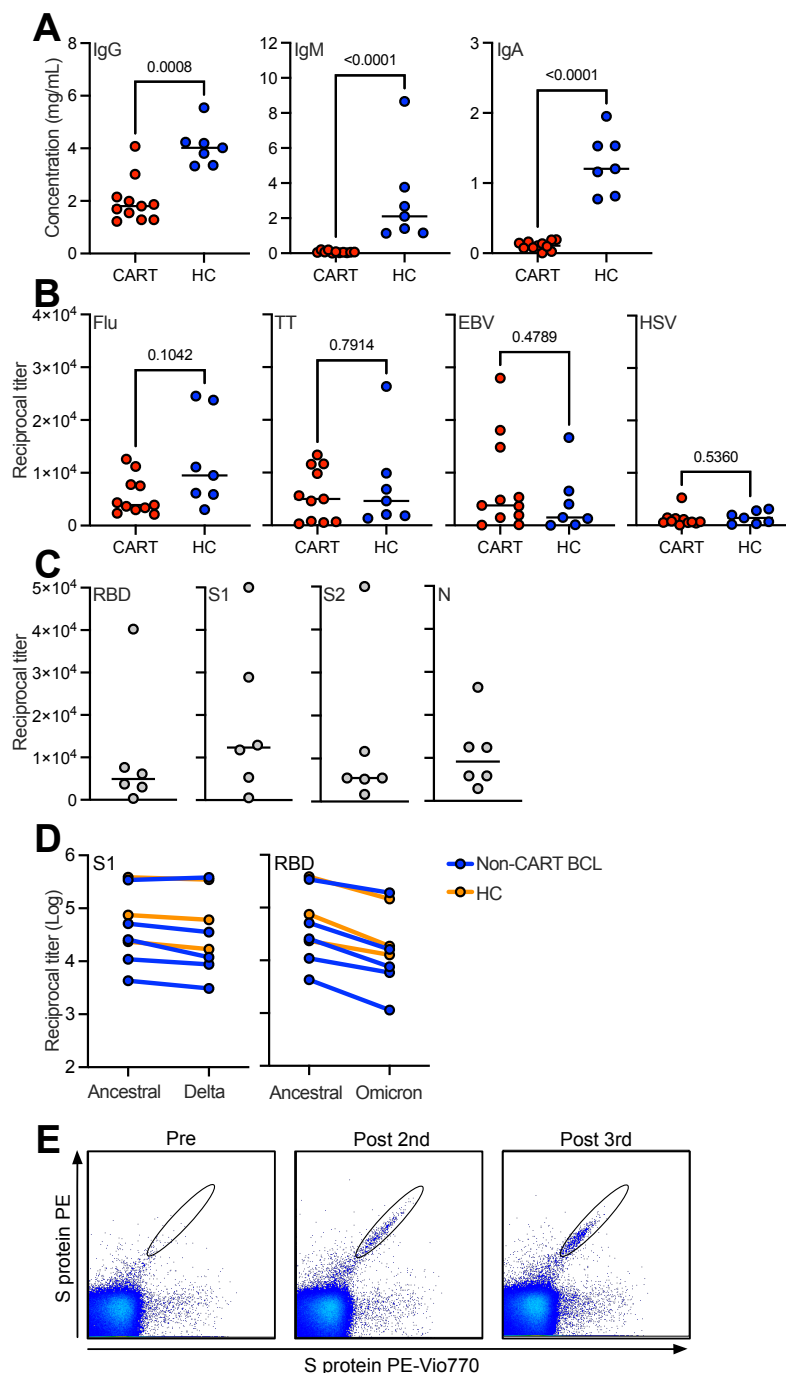

### Supplemental Figure 2: B cell responses in patients with B cell lymphoma after CART treatment and healthy controls.

(A) Absolute levels of IgG, IgM, and IgA antibodies in our study subjects were measured at baseline using a commercially available ELISA. Concentrations are shown in mg/mL for healthy vaccinated controls (blue) and CART patients (red). (B) Titers of IgG antibodies against full-length recombinant Influenza A nucleoprotein (Flu), tetanus toxoid (TT), Epstein-Barr virus (EBV), and Herpes Simplex Virus Type 1 (HSV) proteins were measured in an ELISA. Lines indicate median values. Differences between groups were analyzed for statistical significance using the Mann–Whitney U test (C) IgG antibody titers against 4 different SARS-CoV-2 proteins in a group of 6 patients with active COVID-19. (D) IgG antibody titers against the ancestral and omicron S1 and RBD proteins, respectively, in 3 B cell lymphoma patients without prior CART treatment and 5 healthy vaccinated controls. (E) Anti-S antibody-secreting B cells in a B cell lymphoma patient (2123-021) without prior CART treatment before vaccination and after the 2<sup>nd</sup> and 3<sup>rd</sup> dose, respectively.

## Supplemental Figure 3

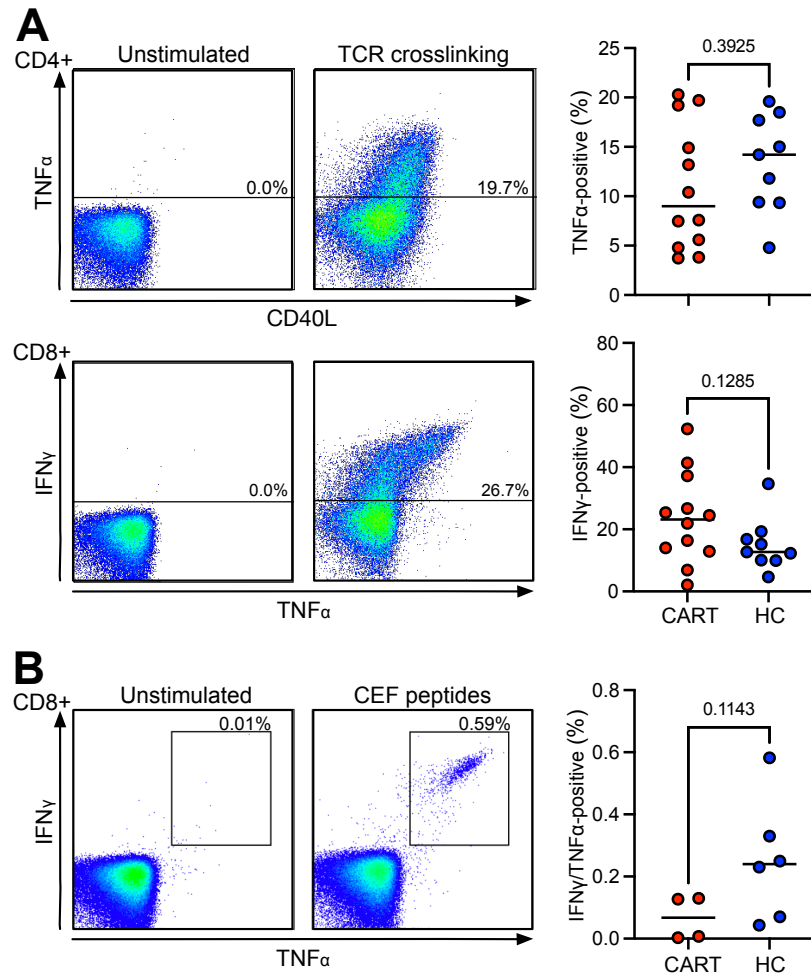

### **Supplemental Figure 3: T cell responses to TCR crosslinking or stimulation with a mix of cytomegalovirus (HCMV), Epstein-Barr virus (EBV), and influenza virus peptides**

**(A)** T cells responding to TCR crosslinking were identified by co-expression of TNF $\alpha$  and CD40L (CD154) for CD3<sup>+</sup>CD4<sup>+</sup> T cells and IFN $\gamma$  / TNF $\alpha$  for CD3<sup>+</sup>CD8<sup>+</sup> T cells. Scatter plots indicate levels of responding CD4<sup>+</sup> (upper right) and CD8<sup>+</sup> T cells (lower right) prior to vaccination (12 CART patients, 9 HC). Lines indicate median values. Differences between groups were analyzed for statistical significance using the Mann-Whitney U test. **(B)** Levels of CD8<sup>+</sup> T cells responding to stimulation with a mix of cytomegalovirus (CMV), Epstein-Barr virus (EBV), and influenza virus peptides in 4 CART patients and 6 HC prior to COVID-19 vaccination.

## Supplemental Figure 4

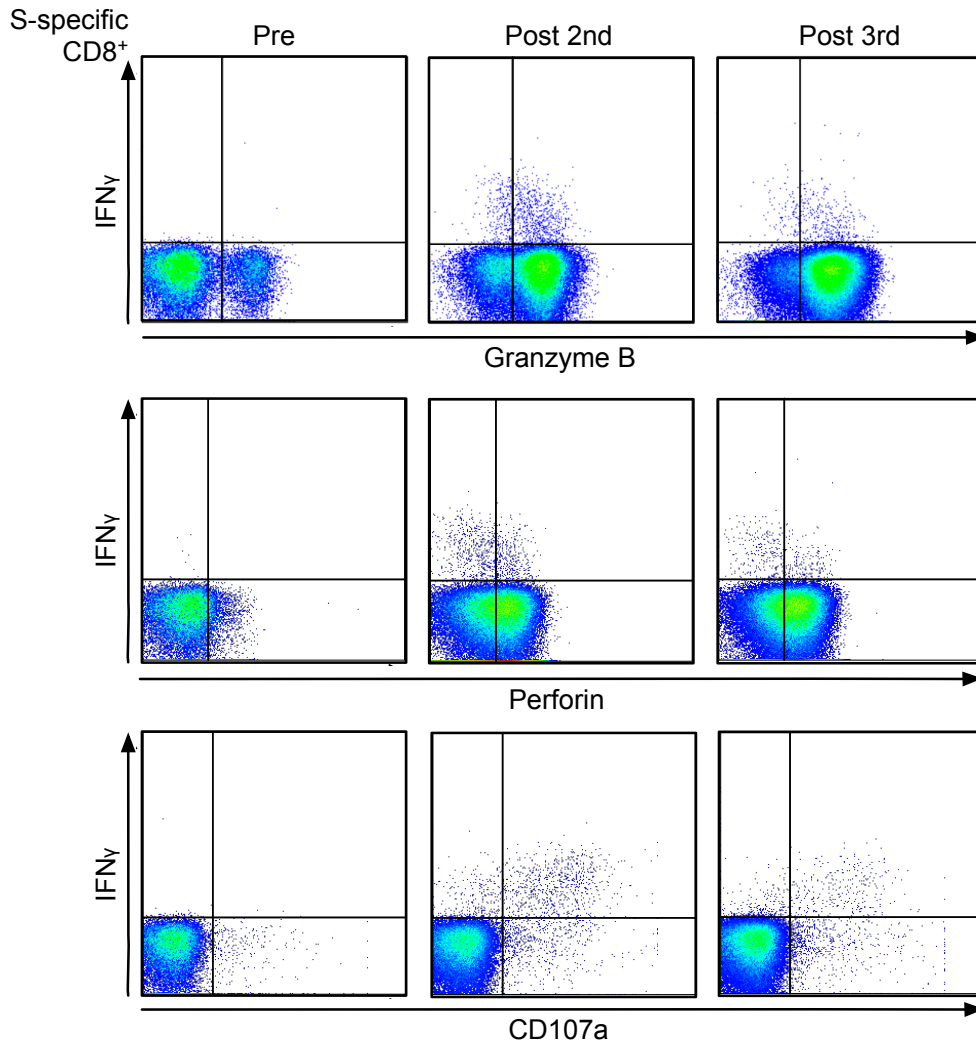

### **Supplemental Figure 4: Cytotoxic potential of vaccine-induced CD8<sup>+</sup> T cells**

T cells specific for the S protein of the SARS-CoV-2 at three timepoints (pre vaccination, post 2<sup>nd</sup> dose, post 3<sup>rd</sup> dose) were identified ex vivo after short-term stimulation of total PBMC using libraries of overlapping peptides covering the complete sequence of the protein. Intracellular staining of cytokines followed by flow cytometry served as a read-out assay. SARS-CoV-2-specific CD8<sup>+</sup> T cells were defined as IFN $\gamma$ -positive CD3<sup>+</sup>CD8<sup>+</sup> T cells. To determine the cytotoxic potential of the vaccine-induced T cells, co-staining was performed for granzyme B, perforin, and CD107a. Dot plots show examples of CART patient 2123-034. Background levels were typically <0.01% of all CD8<sup>+</sup> T cells.

## Supplemental Figure 5

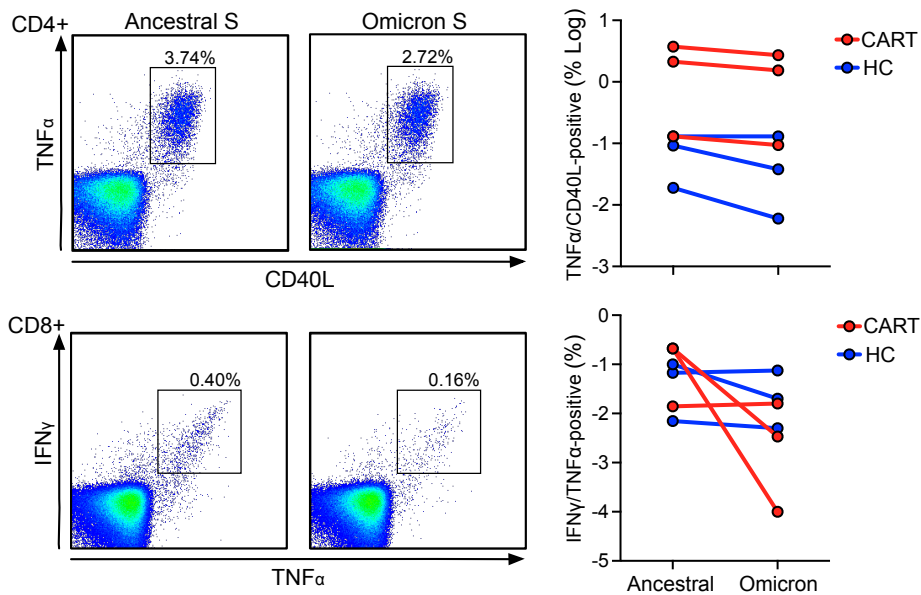

### **Supplemental Figure 5: Recognition of ancestral vs. omicron SARS-CoV-2 S protein by vaccine-induced T cells**

The dot plots on the left show an example of a CART patient's (2123-067) vaccine-induced antiviral CD4<sup>+</sup> (upper panel) and CD8<sup>+</sup> T cells (lower panel) recognizing peptide pools covering the complete sequence of ancestral vs. omicron SARS-CoV-2 S protein. Numbers indicate percentages of S protein-specific T cells out of all CD4<sup>+</sup> and CD8<sup>+</sup> T cells, respectively. Lines on the right summarize similar findings in 3 CART patients and 3 healthy vaccinated controls.

## Supplemental Figure 6

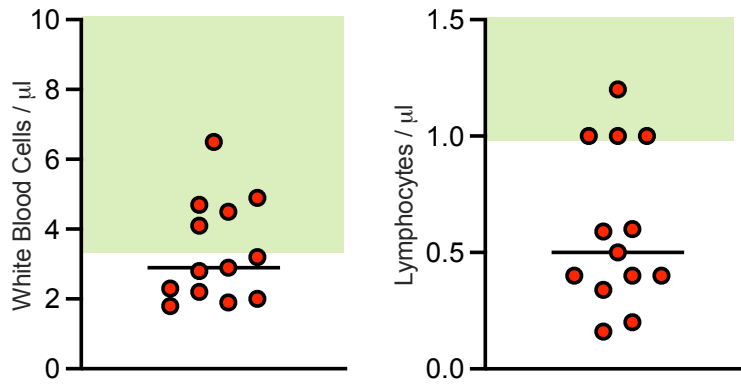

**Supplemental Figure 6: Absolute leukocyte and lymphocyte counts in CAR T cell patients at 4 weeks after the 2<sup>nd</sup> dose of the COVID-19 vaccine**

Absolute white blood cell counts and lymphocyte counts were measured in CD19 CAR T cell patients (N=13) at 4 weeks after the the 2nd dose of the COVID-19 vaccine. The line indicates median values and the green area indicates normal reference ranges.
